# Supplementary material for: 分割前の共有遺産の使用と使用利益の返還-最高裁2000年4月7日判決を素材に-(神田孝夫名誉教授記念号)
Source: Hindawi journal article supplement (doi:10.1155/2021/6671300), 2001-12-26
Supplement: f1 [file 6671300.f1.pdf]

Table S1

Supplementary Table S1 List of salamander taxa used in this study

| Family                           | Species                              | Accession No.<br>Mt genome    | BDNF      | POMC     | Rag1     | Rag2     | Lungs    | Life cycle in Plethodontidae |
|----------------------------------|--------------------------------------|-------------------------------|-----------|----------|----------|----------|----------|------------------------------|
| Ambystomatidae                   | <i>Ambystoma barbouri</i>            | NC_014568                     | KJ610094  | KJ610458 |          |          | +        |                              |
|                                  | <i>Ambystoma bishopi</i>             | NC_027501                     |           |          |          |          | +        |                              |
|                                  | <i>Ambystoma laterale</i>            | NC_006330                     |           |          |          |          | +        |                              |
|                                  | <i>Ambystoma mexicanum</i>           | NC_005797                     |           |          | AY323752 | KC165605 | +        |                              |
|                                  | <i>Dicamptodon aterrimus</i>         | GQ368657                      |           |          | KC165591 | KC165611 | +        |                              |
| Amphiumidae                      | <i>Amphiuma means</i>                | GQ368656                      |           | AY141896 | AY650127 | KC165604 | +        |                              |
|                                  | <i>Andrias japonicus</i>             | NC_007446                     |           |          | AY583346 |          | +        |                              |
| Cryptobranchidae                 | <i>Cryptobranchius alleganiensis</i> | GQ368662                      |           |          | AY650141 |          | +        |                              |
|                                  | <i>Batrachuperus yenyuanensis</i>    | NC_012430                     | HM037740  | HM037765 | HM037715 | KC165607 | +        |                              |
| Hynobiidae                       | <i>Hynobius arisanensis</i>          | NC_009335                     |           |          |          |          | +        |                              |
|                                  | <i>Hynobius guabangshanensis</i>     | NC_013762                     | HM037743  | HM037768 | HM037718 | KJ715336 | +        |                              |
|                                  | <i>Hynobius kimurae</i>              | NC_026032                     |           |          | KJ715369 | KJ715332 | +        |                              |
|                                  | <i>Hynobius maoershanensis</i>       | NC_023789                     | HM037745  | HM037770 | HM037720 |          | +        |                              |
|                                  | <i>Hynobius nebulosus</i>            | NC_020650                     | HM037746  | HM037771 | AY650144 |          | +        |                              |
|                                  | <i>Hynobius nigrescens</i>           | NC_026033                     |           |          | KJ715356 | KJ715337 | +        |                              |
|                                  | <i>Hynobius yangi</i>                | NC_013825                     |           |          |          |          | +        |                              |
|                                  | <i>Liua shihi</i>                    | NC_008078                     | HM037751  | HM037776 | HM037726 | KJ715344 | +        |                              |
|                                  | <i>Liua tsinpaensis</i>              | NC_008081                     | HM037752  | HM037777 | HM037727 | KJ715345 | +        |                              |
|                                  | <i>Onychodactylus zhangyapingi</i>   | NC_026853                     |           |          |          |          | -        |                              |
|                                  | <i>Onychodactylus zhaermii</i>       | NC_026854                     |           |          |          |          | -        |                              |
|                                  | <i>Pachyhynobius shangchengensis</i> | NC_008080                     | HM037754  | HM037779 | HM037729 | KJ715349 | +        |                              |
|                                  | <i>Paradactylodon gorganensis</i>    | NC_008091                     | HM037755  | HM037780 | HM037730 |          | +        |                              |
|                                  | <i>Paradactylodon mustersi</i>       | NC_008090                     | HM037756  | HM037781 | HM037731 | KJ715350 | +        |                              |
|                                  | <i>Pseudohynobius flavomaculatus</i> | NC_020635                     | HM037758  | HM037783 | HM037733 | KJ715346 | +        |                              |
|                                  | <i>Pseudohynobius jinbo</i>          | NC_026698                     |           |          |          |          | +        |                              |
|                                  | <i>Pseudohynobius shuichengensis</i> | NC_021001                     |           | HM037784 | HM037734 | KJ715347 | +        |                              |
|                                  | <i>Ranodon sibiricus</i>             | NC_004021                     | HM037760  | HM037785 | HM037735 | KC165618 | +        |                              |
|                                  | <i>Salamandrella keyserlingii</i>    | NC_008082                     | KJ855091  | KJ855092 | AY650145 | MF567484 | +        |                              |
|                                  | Plethodontidae                       | <i>Aneides flavipunctatus</i> | NC_006327 | MF946481 | MF946506 |          |          | -                            |
| <i>Aneides hardii</i>            |                                      | NC_006338                     | MF946486  |          | EU275780 | KC165603 | -        | DD                           |
| <i>Batrachoseps attenuatus</i>   |                                      | NC_006340                     | JF449372  | KP900129 | KM202870 | KF911907 | -        | DD                           |
| <i>Batrachoseps nigriventris</i> |                                      | NC_028184                     |           |          | KM202742 | KM202918 | -        | DD                           |
| <i>Batrachoseps wrighti</i>      |                                      | NC_006333                     | JF449369  |          | KM202864 | KM203042 | -        | DD                           |
| <i>Bolitoglossa</i> sp.          |                                      | NC_006346                     |           |          |          |          | -        | DD                           |
| <i>Desmognathus fuscus</i>       |                                      | NC_006339                     | EU275858  | EU275812 | EU275781 | KF911911 | -        | MM                           |
| <i>Desmognathus wrighti</i>      |                                      | NC_006337                     |           | KR732363 | AY691699 | KF911913 | -        | DD                           |
| <i>Ensatina eschscholtzii</i>    |                                      | NC_006328                     | EU275862  | EU275816 | AY650119 | KF911914 | -        | DD                           |
| <i>Eurycea bislineata</i>        |                                      | NC_006329                     | EU275861  | JQ920726 | AY691706 | KC165612 | -        | MM                           |
| <i>Gyrinophilus palleucus</i>    |                                      | NC_028297                     |           |          | KY073116 |          | -        | MM                           |
| <i>Hemidactylium scutatum</i>    |                                      | NC_006342                     | EU275898  | EU275852 | AY691711 | KF911917 | -        | MM                           |
| <i>Hydromantes brunus</i>        |                                      | NC_006345                     | EU275871  | EU275825 | HM797619 |          | -        | DD                           |
| <i>Oedipina poelzi</i>           |                                      | NC_006326                     |           |          |          |          | -        | DD                           |
| <i>Phaeognathus hubrichti</i>    |                                      | NC_006344                     | EU275860  | EU275814 | AY691700 |          | -        | DD                           |
| <i>Plethodon elongatus</i>       |                                      | NC_006335                     | EU275882  | EU275836 | AY650120 |          | -        | DD                           |
| <i>Pseudotriton ruber</i>        |                                      | NC_006332                     | EU275900  | EU275854 | AY650123 | KF911925 | -        | MM                           |
| <i>Stereochilus marginatus</i>   |                                      | NC_006325                     | EU275859  | JQ920723 | AY691713 | KF911926 | -        | MM                           |
| <i>Thorius</i> sp.               |                                      | NC_006336                     |           |          |          |          | -        | DD                           |
| Proteidae                        |                                      | <i>Necturus beyeri</i>        | NC_023341 |          | JX144998 | JX145010 | KC165613 | +                            |
|                                  | <i>Proteus anguinus</i>              | NC_023342                     |           | KC295576 | AY650138 | KC165615 | +        |                              |
| Rhyacotritonidae                 | <i>Rhyacotriton variegatus</i>       | NC_006331                     | EU275869  | EU275823 | AY691693 | KC165619 | +        |                              |
| Salamandridae                    | <i>Chioglossa lusitanica</i>         | EU880308                      |           |          | AY583347 |          | +        |                              |
|                                  | <i>Echinotriton andersoni</i>        | NC_017870                     |           | HM462065 |          |          | +        |                              |
|                                  | <i>Lyciasalamandra atifi</i>         | NC_002756                     |           |          |          |          | +        |                              |
|                                  | <i>Notophthalmus perstriatus</i>     | NC_028278                     |           |          |          |          | +        |                              |
|                                  | <i>Pachytriton feii</i>              | NC_029345                     |           |          | KU375037 | JX907980 | +        |                              |
|                                  | <i>Paramesotriton chinensis</i>      | NC_035008                     |           |          |          |          | +        |                              |
|                                  | <i>Salamandrina terdigitata</i>      | EU880332                      |           |          | HQ915067 |          | +        |                              |
|                                  | <i>Triturus macedonicus</i>          | NC_015794                     |           |          |          |          | +        |                              |
|                                  | <i>Triturus pygmaeus</i>             | NC_015796                     |           |          |          |          | +        |                              |
|                                  | <i>Tylotriton kweichowensis</i>      | NC_029231                     | KY800640  | KC733384 |          |          | +        |                              |
| Sirenidae                        | <i>Pseudobranchius axanthus</i>      | GQ368660                      |           | JX145003 | JX145015 | KC165616 | +        |                              |
|                                  | <i>Siren intermedia</i>              | GQ368661                      |           | JX145005 | AY583353 | KC165620 | +        |                              |

Table S2

**Supplementary Table S2** Best-fit partition scheme and substitution models

| Partition | Gene + Codon position                                     | Substitution model |            |
|-----------|-----------------------------------------------------------|--------------------|------------|
|           |                                                           | IQTREE             | MrBayes    |
| 1         | atp6_1, atp8_1, nd1_1, nd3_1, nd4_1, nd4l_1               | GTR+F+R5           | GTR+F+I+G4 |
| 2         | atp6_2, atp8_2, nd1_2, nd2_2, nd3_2, nd4_2, nd4l_2, nd5_2 | TVM+F+R5           | GTR+F+I+G4 |
| 3         | co1_1, co3_2, cyb_1, cyb_2                                | TIM2+F+R5          | GTR+F+I+G4 |
| 4         | co1_2, co2_1                                              | SYM+R4             | SYM+I+G4   |
| 5         | co2_2, co3_1                                              | TPM2u+F+R2         | F81+F+I+G4 |
| 6         | nd2_1, nd5_1                                              | GTR+F+R4           | GTR+F+I+G4 |
| 7         | nd6_1                                                     | TIM2+F+I+G4        | GTR+F+I+G4 |
| 8         | nd6_2                                                     | HKY+F+R3           | HKY+F+I+G4 |

Numbers following G or R represent the number of categories.

Table S3

**Supplementary Table 3** Results of site model analysis

| Gene      | Null model (n.p.) | Alt. model (n.p.) | LRT          | $\omega$ (M0) |
|-----------|-------------------|-------------------|--------------|---------------|
| ATP6      | M0 (121)          | M3 (126)          |              | 0.03724       |
|           | InL -18000.496357 | -15630.310836     | <b>0.000</b> |               |
|           | M1a (123)         | M2a (125)         |              |               |
|           | InL -16178.537504 | -16178.53751      | -            |               |
|           | M7 (123)          | M8 (125)          |              |               |
|           | InL -15601.93418  | -15601.93602      | -            |               |
| ATP8      | M8a (124)         | M8 (125)          |              |               |
|           | InL -15601.309362 | -15601.93602      | -            |               |
|           | M0 (121)          | M3 (126)          |              | 0.13866       |
|           | InL -1767.285964  | -1612.522287      | <b>0.000</b> |               |
|           | M1a (123)         | M2a (125)         |              |               |
|           | InL -1639.457606  | -1638.80797       | 0.522        |               |
| COX1      | M7 (123)          | M8 (125)          |              |               |
|           | InL -1608.611551  | -1606.365845      | 0.106        |               |
|           | M8a (124)         | M8 (125)          |              |               |
|           | InL -1606.63545   | -1606.365845      | 0.463        |               |
|           | M0 (121)          | M3 (126)          |              | 0.00855       |
|           | InL -39900.319837 | -31436.760677     | <b>0.000</b> |               |
| COX2      | M1a (123)         | M2a (125)         |              |               |
|           | InL -31973.925214 | -31973.925214     | 1.000        |               |
|           | M7 (123)          | M8 (125)          |              |               |
|           | InL -31424.381615 | -31424.386685     | -            |               |
|           | M8a (124)         | M8 (125)          |              |               |
|           | InL -31421.370034 | -31424.386685     | -            |               |
| COX3      | M0 (121)          | M3 (126)          |              | 0.02328       |
|           | InL -16827.851769 | -13929.963922     | <b>0.000</b> |               |
|           | M1a (123)         | M2a (125)         |              |               |
|           | InL -14215.074489 | -14215.074489     | 1.000        |               |
|           | M7 (123)          | M8 (125)          |              |               |
|           | InL -13924.766613 | -13924.768873     | -            |               |
| CYTB      | M8a (124)         | M8 (125)          |              |               |
|           | InL -13923.483977 | -13924.768873     | -            |               |
|           | M0 (121)          | M3 (126)          |              | 0.02976       |
|           | InL -18429.076548 | -15419.218485     | <b>0.000</b> |               |
|           | M1a (123)         | M2a (125)         |              |               |
|           | InL -15948.945676 | -15948.945676     | 1.000        |               |
| CYTB      | M7 (123)          | M8 (125)          |              |               |
|           | InL -15394.600829 | -15394.602917     | -            |               |
|           | M8a (124)         | M8 (125)          |              |               |
|           | InL -15393.444469 | -15394.602917     | -            |               |
|           | M0 (121)          | M3 (126)          |              | 0.03365       |
|           | InL -34165.175775 | -29006.708198     | <b>0.000</b> |               |
| CYTB      | M1a (123)         | M2a (125)         |              |               |
|           | InL -30125.289556 | -30125.289556     | 1.000        |               |
|           | M7 (123)          | M8 (125)          |              |               |
|           | InL -28981.353549 | -28981.357319     | -            |               |
| M8a (124) | M8 (125)          |                   |              |               |

Table S3

|      |           |               |               |              |         |
|------|-----------|---------------|---------------|--------------|---------|
| ND1  | InL       | -28980.765282 | -28981.357319 | -            | 0.02645 |
|      | M0 (121)  |               | M3 (126)      |              |         |
|      | InL       | -26480.902137 | -22321.408577 | <b>0.000</b> |         |
|      | M1a (123) |               | M2a (125)     |              |         |
|      | InL       | -23103.125516 | -23103.125551 | -            |         |
| ND2  | M7 (123)  |               | M8 (125)      |              | 0.05317 |
|      | InL       | -22308.465961 | -22308.468951 | -            |         |
|      | M8a (124) |               | M8 (125)      |              |         |
|      | InL       | -22307.594155 | -22308.468951 | -            |         |
|      | M0 (121)  |               | M3 (126)      |              |         |
| ND3  | InL       | -29851.10539  | -26922.567855 | <b>0.000</b> | 0.04871 |
|      | M1a (123) |               | M2a (125)     |              |         |
|      | InL       | -27692.028658 | -27692.028658 | 1.000        |         |
|      | M7 (123)  |               | M8 (125)      |              |         |
|      | InL       | -26895.343391 | -26895.346431 | -            |         |
| ND4  | M8a (124) |               | M8 (125)      |              | 0.0416  |
|      | InL       | -26894.934545 | -26895.346431 | -            |         |
|      | M0 (121)  |               | M3 (126)      |              |         |
|      | InL       | -10034.050928 | -8580.749766  | <b>0.000</b> |         |
|      | M1a (123) |               | M2a (125)     |              |         |
| ND41 | InL       | -8951.551042  | -8951.551042  | 1.000        | 0.03979 |
|      | M7 (123)  |               | M8 (125)      |              |         |
|      | InL       | -8578.494095  | -8578.495125  | -            |         |
|      | M8a (124) |               | M8 (125)      |              |         |
|      | InL       | -8578.043563  | -8578.495125  | -            |         |
| ND5  | M0 (121)  |               | M3 (126)      |              | 0.04813 |
|      | InL       | -39574.003357 | -34673.370898 | <b>0.000</b> |         |
|      | M1a (123) |               | M2a (125)     |              |         |
|      | InL       | -35843.649173 | -35843.649173 | 1.000        |         |
|      | M7 (123)  |               | M8 (125)      |              |         |
| ND5  | InL       | -34622.498124 | -34622.502231 | -            | 0.04813 |
|      | M8a (124) |               | M8 (125)      |              |         |
|      | InL       | -34621.459507 | -34622.502231 | -            |         |
|      | M0 (121)  |               | M3 (126)      |              |         |
|      | InL       | -7907.917641  | -6900.888554  | <b>0.000</b> |         |
| ND5  | M1a (123) |               | M2a (125)     |              | 0.04813 |
|      | InL       | -7149.575349  | -7149.575349  | 1.000        |         |
|      | M7 (123)  |               | M8 (125)      |              |         |
|      | InL       | -6897.612831  | -6897.613671  | -            |         |
|      | M8a (124) |               | M8 (125)      |              |         |
| ND5  | InL       | -6897.535354  | -6897.613671  | -            | 0.04813 |
|      | M0 (121)  |               | M3 (126)      |              |         |
|      | InL       | -51719.607871 | -45408.281543 | <b>0.000</b> |         |
|      | M1a (123) |               | M2a (125)     |              |         |
|      | InL       | -47218.308293 | -47218.308293 | 1.000        |         |
| ND5  | M7 (123)  |               | M8 (125)      |              | 0.04813 |
|      | InL       | -45343.881613 | -45343.886424 | -            |         |
|      | M8a (124) |               | M8 (125)      |              |         |
| ND5  | InL       | -45342.385343 | -45343.886424 | -            |         |

Table S3

|     |               |               |              |         |
|-----|---------------|---------------|--------------|---------|
| ND6 | M0 (121)      | M3 (126)      |              | 0.05089 |
| InL | -12177.525846 | -10809.786492 | <b>0.000</b> |         |
|     | M1a (123)     | M2a (125)     |              |         |
| InL | -11159.398501 | -11159.398501 | 1.000        |         |
|     | M7 (123)      | M8 (125)      |              |         |
| InL | -10784.246169 | -10784.247429 | -            |         |
|     | M8a (124)     | M8 (125)      |              |         |
| InL | -10783.79465  | -10784.247429 | -            |         |

n.p. is the estimated number of parameters. Dash represents InL of alternative model is lower than that of null model, and unable to perform LRT.

Table S4

**Supplementary Table 4** Results of branch model analyses without internal branches.

| Comparison                               | Gene                                            | Branch model                |              |            |            |
|------------------------------------------|-------------------------------------------------|-----------------------------|--------------|------------|------------|
|                                          |                                                 | -2 $\Delta\ln L$ (d.f. = 1) | p-value      | $\omega_1$ | $\omega_2$ |
| Plethodontidae<br>vs. lunged salamanders | <i>atp6</i>                                     | -10.0672                    | <b>0.002</b> | 0.048      | 0.033      |
|                                          | <i>atp8</i>                                     | -0.0467                     | 0.829        | 0.132      | 0.139      |
|                                          | <i>cox1</i>                                     | -28.4104                    | <b>0.000</b> | 0.012      | 0.007      |
|                                          | <i>cox2</i>                                     | -36.7897                    | <b>0.000</b> | 0.038      | 0.018      |
|                                          | <i>cox3</i>                                     | -2.1061                     | 0.147        | 0.034      | 0.028      |
|                                          | <i>cytb</i>                                     | -4.6570                     | <b>0.031</b> | 0.036      | 0.030      |
|                                          | <i>nad1</i>                                     | -7.6948                     | <b>0.006</b> | 0.030      | 0.023      |
|                                          | <i>nad2</i>                                     | -31.2956                    | <b>0.000</b> | 0.067      | 0.041      |
|                                          | <i>nad3</i>                                     | -1.3742                     | 0.241        | 0.058      | 0.049      |
|                                          | <i>nad4</i>                                     | -12.8570                    | <b>0.000</b> | 0.050      | 0.038      |
|                                          | <i>nad4L</i>                                    | -0.0004                     | 0.983        | 0.040      | 0.040      |
|                                          | <i>nad5</i>                                     | -19.2041                    | <b>0.000</b> | 0.053      | 0.040      |
|                                          | <i>nad6</i>                                     | -15.5252                    | <b>0.000</b> | 0.074      | 0.042      |
|                                          | <i>Onychodactylus</i><br>vs. lunged salamanders | <i>atp6</i>                 | -0.0221      | 0.882      | 0.035      |
| <i>atp8</i>                              |                                                 | -0.1093                     | 0.741        | 0.105      | 0.137      |
| <i>cox1</i>                              |                                                 | -1.2962                     | 0.255        | 0.003      | 0.009      |
| <i>cox2</i>                              |                                                 | -0.0349                     | 0.852        | 0.016      | 0.024      |
| <i>cox3</i>                              |                                                 | -0.0006                     | 0.980        | 0.029      | 0.030      |
| <i>cytb</i>                              |                                                 | -0.1953                     | 0.659        | 0.027      | 0.032      |
| <i>nad1</i>                              |                                                 | -0.0785                     | 0.779        | 0.021      | 0.026      |
| <i>nad2</i>                              |                                                 | -0.1300                     | 0.718        | 0.045      | 0.049      |
| <i>nad3</i>                              |                                                 | -0.5475                     | 0.459        | 0.069      | 0.051      |
| <i>nad4</i>                              |                                                 | -1.4853                     | 0.223        | 0.052      | 0.042      |
| <i>nad4L</i>                             |                                                 | -0.0208                     | 0.885        | 0.036      | 0.040      |
| <i>nad5</i>                              |                                                 | -1.8241                     | 0.177        | 0.053      | 0.044      |
| <i>nad6</i>                              |                                                 | -0.6594                     | 0.417        | 0.059      | 0.053      |

Values with bold showed  $P < 0.05$ .  $\omega_1$  and  $\omega_2$  indicate  $\omega$  values in test and reference lineages, respectively.
